# Supplementary material for: Targeting S100B with Peptides Encoding Intrinsic Aggregation-Prone Sequence Segments
Source: PubMed Central journal article supplement (PMC7830867; doi:10.3390/molecules26020440), 2021-01-15
Supplement: molecules-26-00440-s001.pdf [file molecules-26-00440-s001.pdf]

# Targeting S100B with Peptides Encoding Intrinsic Aggregation-Prone Sequence Segments

Joana S. Cristóvão <sup>1,2</sup>, Mariana A. Romão <sup>1,2</sup>, Rodrigo Gallardo <sup>3,4,†</sup>, Joost Schymkowitz <sup>3,4,\*</sup>, Frederic Rousseau <sup>3,4,\*</sup> and Cláudio M. Gomes <sup>1,2,\*</sup>

- <sup>1</sup> Biosystems and Integrative Sciences Institute, Faculdade de Ciências, Universidade Lisboa, 1749-016 Lisbon, Portugal; jmcristovao@fc.ul.pt (J.S.C.); maromao@fc.ul.pt (M.A.R.)
  - <sup>2</sup> Departamento de Química e Bioquímica, Faculdade de Ciências, Universidade Lisboa, 1749-016 Lisbon, Portugal
  - <sup>3</sup> VIB Switch Laboratory, Flanders Institute for Biotechnology (VIB), 3000 Leuven, Belgium; rodrigo.gallardo@switch.vib-kuleuven.be
  - <sup>4</sup> Switch Laboratory, Department of Cellular and Molecular Medicine, KU Leuven, Herestraat 49, PB 802, 3000 Leuven, Belgium
- \* Correspondence: cmgomes@fc.ul.pt (C.M.G.); frederic.rousseau@kuleuven.vib.be (F.R.); joost.schymkowitz@kuleuven.vib.be (J.S.)
- † Current address: Astbury Centre for Structural Molecular Biology, School of Molecular and Cellular Biology, University of Leeds, Leeds LS2 9JT, UK

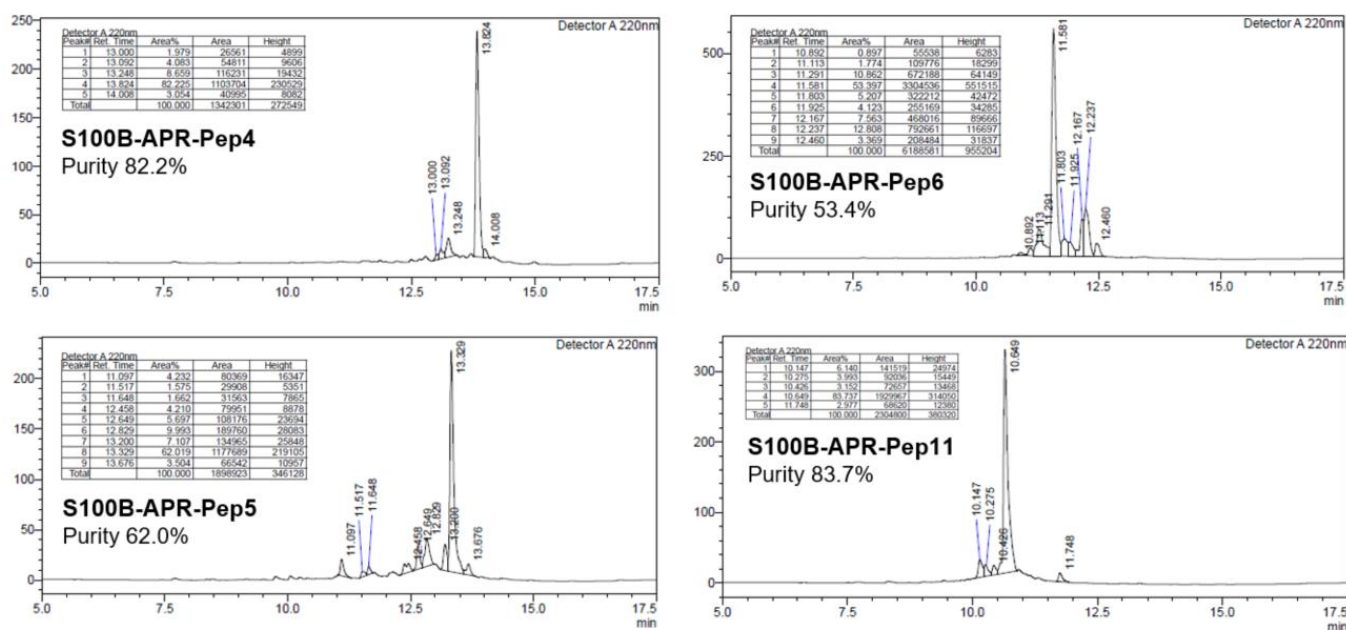

Figure S1. HPLC chromatograms of the synthesized APR-S100B peptides.
